# Supplementary material
Source: PubMed Central journal article supplement (PMC3480588)
Supplement: 12072_2012_9348_MOESM1_ESM.pdf [file 12072_2012_9348_MOESM1_ESM.pdf]

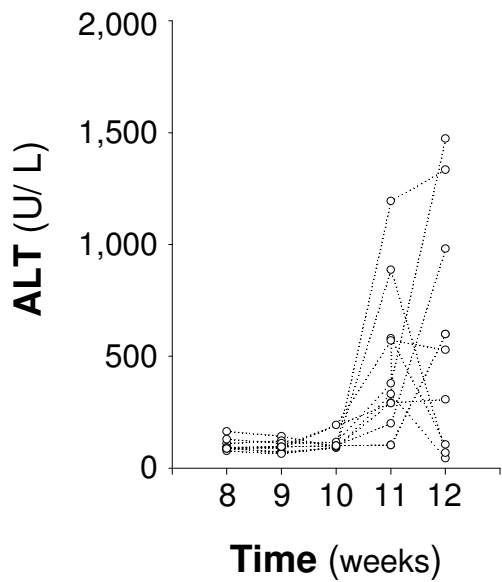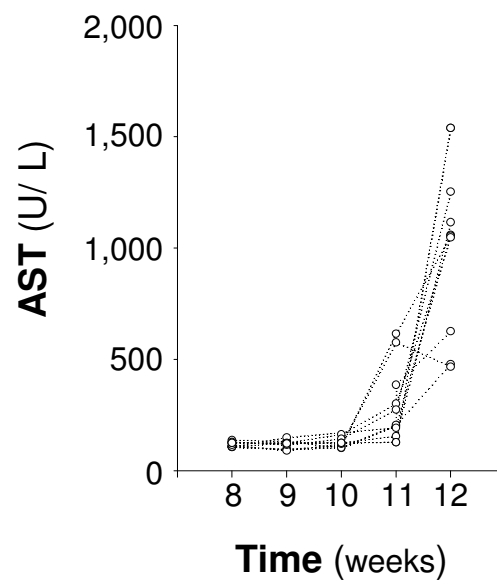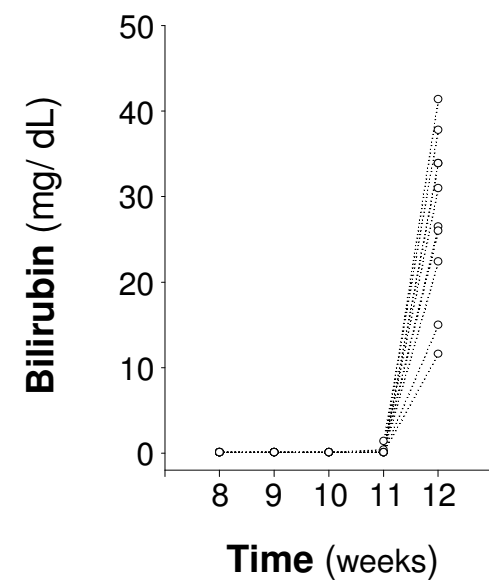

### Supplementary figure S1A

Levels of ALT, AST and bilirubin of group  $LEC_{FH}$ . LEC rats received high copper diet until fulminant hepatitis (week 12). Lines indicate same animal ( $n=10$ ). Note, LEC rats housed on low copper diet ( $LEC_L$ ) and LEA rats housed on high copper diet showed normal levels of hepatitis-associated serum markers (data not shown).

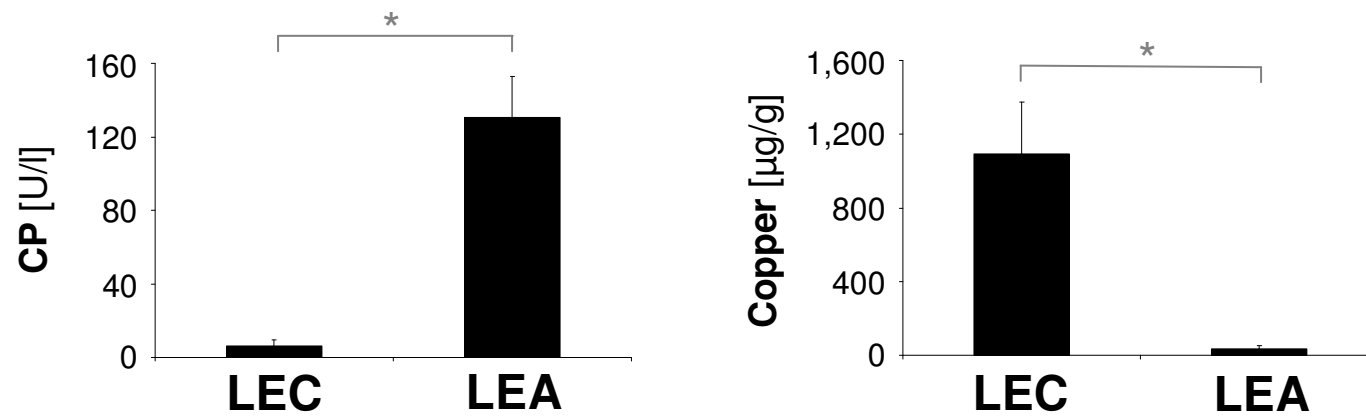

### Supplementary figure S1B

Ceruloplasmin oxidase activity (left) and liver copper content (right) was determined. Samples from LEC rats were obtained at fulminant hepatitis. LEA rats served as a control. 10 animals were analyzed per group. Asterisks indicate significance ( $p < 0.05$ ).

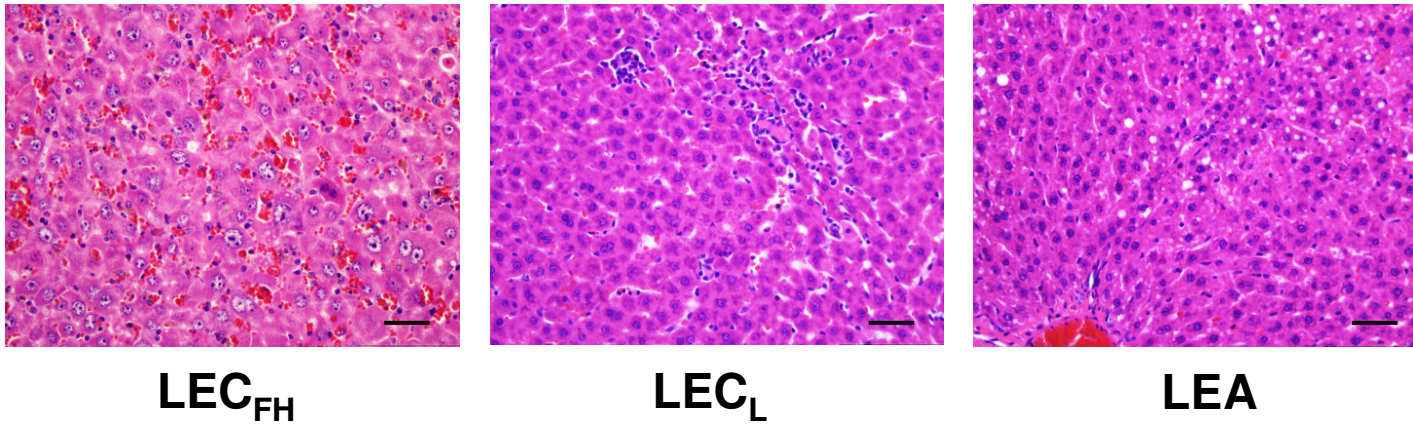

**Supplementary figure S1C**

One representative hematoxylin and eosin stain of liver for each group is shown. Animals were sacrificed when rats encountered fulminant hepatitis (LEC<sub>FH</sub>) after high copper diet or after sacrifice (LEC<sub>L</sub> and LEA). Liver histology of LEC rats housed on low copper diet (LEC<sub>L</sub>) and of LEA rats housed on high copper diet were normal. Bar = 50 mm.

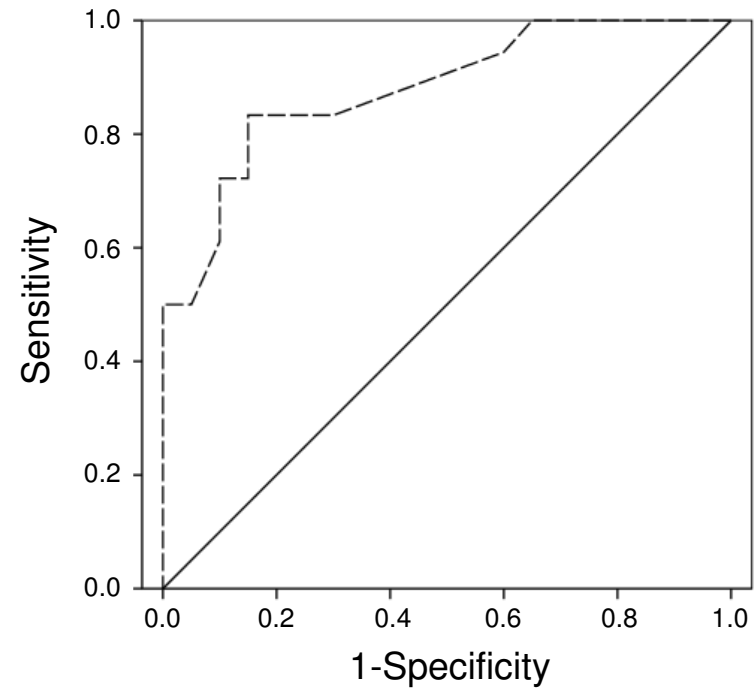

**Supplementary figure S2**

Receiver operating characteristic (ROC) curve of serum miR-122 (dashed line). LEC rats (n=18) were housed on high copper diet and analyzed at week 10. The solid line corresponds to the reference line.

**Supplementary table S1.** Serum markers after cell therapy of LEC rat

| <b>LEC</b> | <b>miR-122</b><br>(factor) | <b>ALT</b><br>(U/ L) | <b>AST</b><br>(U/ L) | <b>Bilirubin</b><br>(mg/ dL) |            |
|------------|----------------------------|----------------------|----------------------|------------------------------|------------|
| sham       | Week 8                     | 0.4 ± 0              | 115.8 ± 13           | 128.4 ± 4                    | 0.1 ± 0    |
|            | Week 10                    | 2.5 ± 1              | 137.0 ± 40           | 145.0 ± 17                   | 0.1 ± 0    |
|            | Week 12                    | 54.3 ± 20            | 967.0 ± 272          | 1373.2 ± 162                 | 28.3 ± 5   |
|            | Week 15                    | ND*                  | ND*                  | ND*                          | ND*        |
|            | Week 42                    | ND*                  | ND*                  | ND*                          | ND*        |
|            | Tx                         | Week 8               | 0.2 ± 0              | 91.6 ± 8                     | 118.6 ± 13 |
|            | Week 10                    | 2.8 ± 2              | 144.6 ± 60           | 160.0 ± 25                   | 0.1 ± 0    |
|            | Week 12                    | 32.4 ± 22            | 309.8 ± 43           | 278.2 ± 44                   | 0.1 ± 0    |
|            | Week 15                    | 5.9 ± 3              | 240.4 ± 72           | 305.6 ± 105                  | 0.3 ± 0    |
|            | Week 42                    | 1.3 ± 1              | 102.8 ± 5            | 132.4 ± 10                   | 0.1 ± 0    |

Mean ± SE of sham (sham) and hepatocyte (Tx) transplanted rats (n=5). Transplantation started at week 10.

ND, not determined. \*Animals of sham group died
